# Supplementary material for: One-step synthesis of amorphous transition metal sulfides as bifunctional electrocatalysts for the hydrogen evolution reaction and oxygen evolution reaction
Source: Royal Society of Chemistry journal article supplement (doi:10.1039/d2se00886f), 2022-01-01
Supplement: d2se00886f1.pdf [file d2se00886f1.pdf]

## One-step synthesis of amorphous transition metal sulfides as bifunctional electrocatalysts for hydrogen evolution reaction and oxygen evolution reaction

Wenjun He, <sup>a</sup> Fangqing Wang, <sup>a</sup> Yaohui Gao, <sup>a</sup> Qiuyan Hao <sup>\*,a</sup> and Caichi Liu <sup>\*,Δ</sup>

<sup>a</sup> Key Laboratory of Special Functional Materials for Ecological Environment and Information (Hebei University of Technology), Ministry of Education, Tianjin 300130, People's Republic of China.

E-mail: hqy1218@163.com; ccliu@hebut.edu.cn

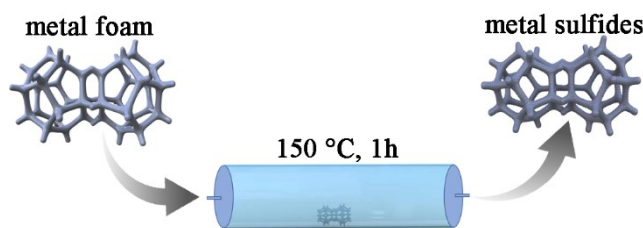

**Fig. S1.** Schematic illustration of the synthesis process.

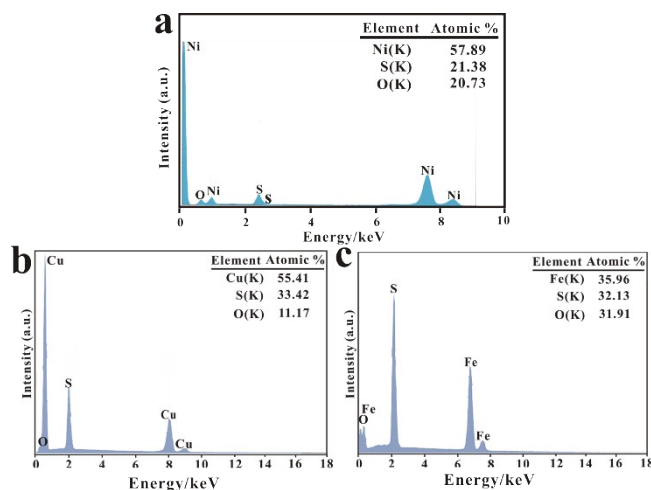

**Fig. S2.** EDS spectra of (a) NiS<sub>x</sub>/NF, (b) CuS<sub>x</sub>/CF and (c) FeS<sub>x</sub>/IF.

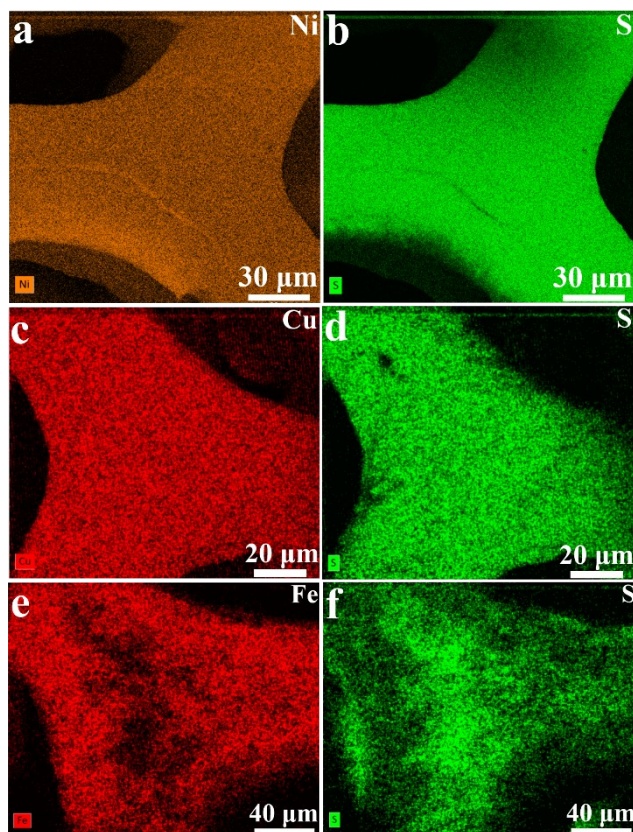

**Fig. S3.** Elemental mapping of (a) Ni, (b) S for NiS<sub>x</sub>/NF, (c) Cu, (d) S for CuS<sub>x</sub>/CF and (e) Fe, (f) S for FeS<sub>x</sub>/IF.

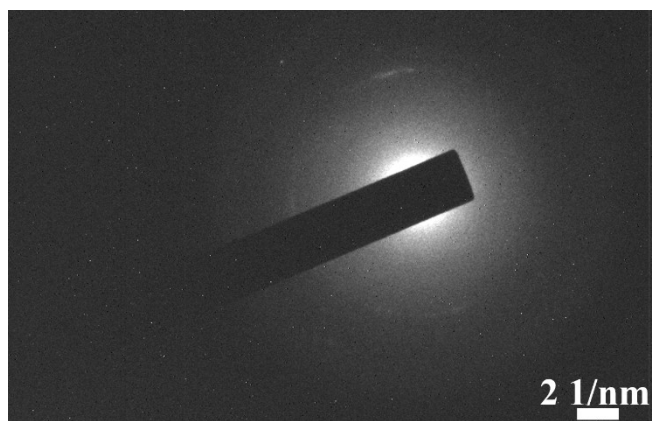

**Fig. S4.** SAED pattern of NiS<sub>x</sub>/NF.

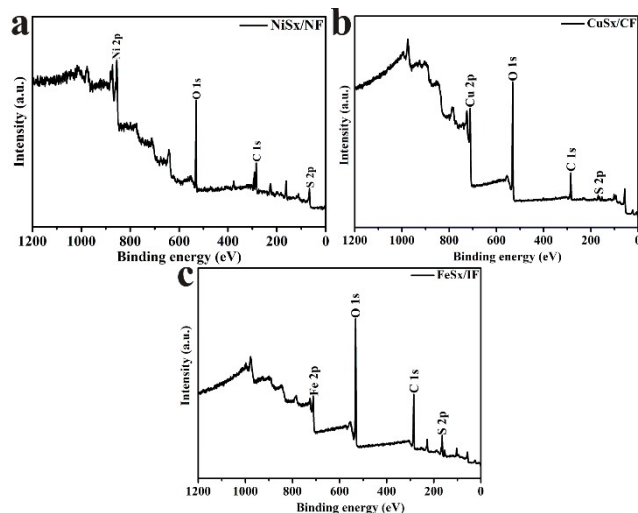

**Fig. S5.** The full spectra of amorphous (a) NiS<sub>x</sub>/NF, (b) CuS<sub>x</sub>/CF and (c) FeS<sub>x</sub>/IF.

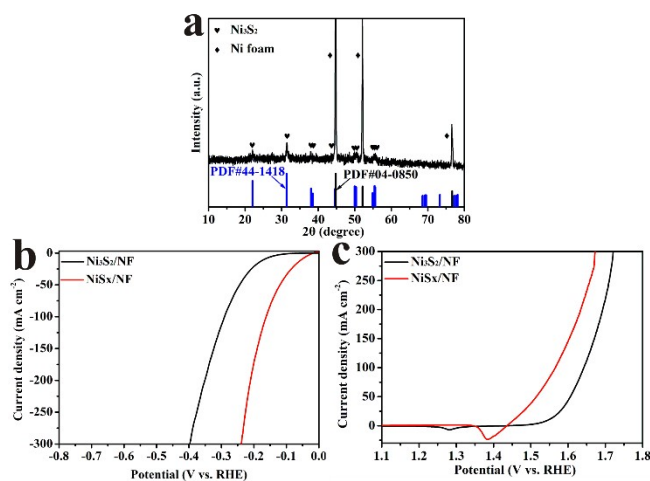

**Fig. S6.** (a) XRD pattern of Ni<sub>3</sub>S<sub>2</sub>/NF. LSV curves of Ni<sub>3</sub>S<sub>2</sub>/NF and NiS<sub>x</sub>/NF for (b) HER and (c) OER.

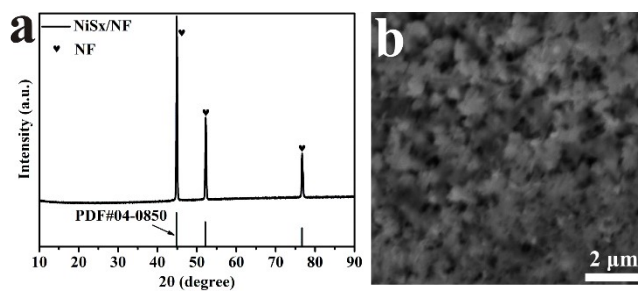

**Fig. S7.** (a) XRD pattern and (b) SEM image of NiS<sub>x</sub>/NF after HER stability test for 100 h.

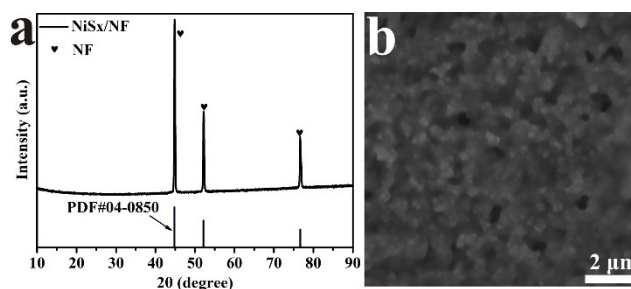

**Fig. S8.** (a) XRD pattern and (b) SEM image of NiS<sub>x</sub>/NF after OER stability test for 100 h.

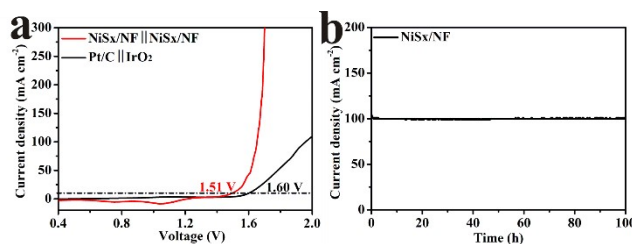

**Fig. S9.** (a) Overall water splitting performance of NiS<sub>x</sub>/NF||NiS<sub>x</sub>/NF and Pt/C||IrO<sub>2</sub> electrode pairs in 1 M KOH. (b) Chronoamperometry curve of NiS<sub>x</sub>/NF||NiS<sub>x</sub>/NF electrode pairs at 100 mA cm<sup>-2</sup> for 100 h.

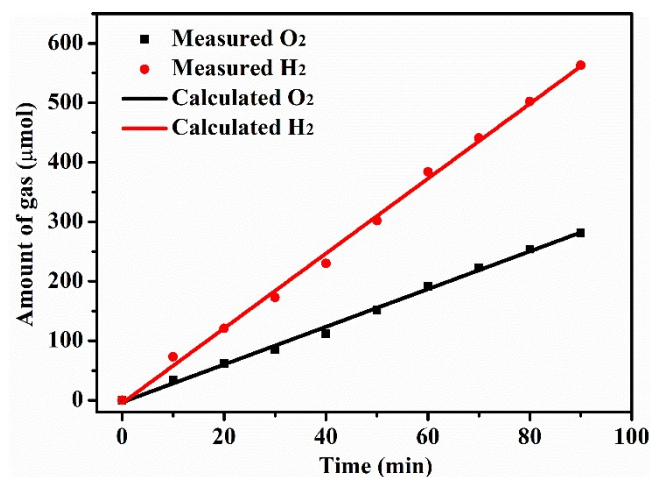

**Fig. S10.** Amount of O<sub>2</sub> and H<sub>2</sub> collected for NiS<sub>x</sub>/NF||NiS<sub>x</sub>/NF during water splitting.

**Table S1.** Comparison of the HER performance of NiS<sub>x</sub>/NF with other reported catalysts in 1 M KOH.

| Catalysts                             | Overpotential at 10 mA cm <sup>-2</sup> (mV) | References |
|---------------------------------------|----------------------------------------------|------------|
| NiS <sub>x</sub> /NF                  | 53                                           | This work  |
| Cl-Ni <sub>3</sub> S <sub>2</sub> /NF | 67                                           | 1          |

|                                                                                      |       |   |
|--------------------------------------------------------------------------------------|-------|---|
| Fe9S10-Vs/IF                                                                         | 149   | 2 |
| Al-Ni <sub>3</sub> S <sub>2</sub> /NF                                                | 86    | 3 |
| CoS <sub>x</sub> @Cu <sub>2</sub> MoS <sub>4</sub> -MoS <sub>2</sub> /NSG            | 118.1 | 4 |
| CuS@MoS <sub>2</sub>                                                                 | 135   | 5 |
| Au/Ni <sub>3</sub> S <sub>2</sub> /NF                                                | 97    | 6 |
| Vs-Ni <sub>3</sub> S <sub>2</sub> /NF                                                | 88    | 7 |
| MoS <sub>2</sub> /Co <sub>9</sub> S <sub>8</sub> /Ni <sub>3</sub> S <sub>2</sub> /Ni | 113   | 8 |

**Table S2. Comparison of the OER performance of NiS<sub>x</sub>/NF with other reported catalysts in 1 M KOH.**

| Catalysts                                                                 | Overpotential at 10 mA cm <sup>-2</sup> (mV) | References |
|---------------------------------------------------------------------------|----------------------------------------------|------------|
| NiS <sub>x</sub> /NF                                                      | 225                                          | This work  |
| Fe <sub>0.8</sub> Ni <sub>0.15</sub> S <sub>1.05</sub>                    | 228                                          | 9          |
| Al-Ni <sub>3</sub> S <sub>2</sub> /NF                                     | 223                                          | 3          |
| CoS <sub>x</sub> @Cu <sub>2</sub> MoS <sub>4</sub> -MoS <sub>2</sub> /NSG | 351.4                                        | 4          |
| Ni <sub>3</sub> S <sub>2</sub> /Ni-Fe-OH/NF                               | 268                                          | 10         |
| Au/Ni <sub>3</sub> S <sub>2</sub> /NF                                     | 230                                          | 6          |
| CuCoS/N-rGO                                                               | 288                                          | 11         |
| NiS <sub>2</sub> /NiSe <sub>2</sub>                                       | 290                                          | 12         |
| Co/Ce-Ni <sub>3</sub> S <sub>2</sub> /NF                                  | 286                                          | 13         |

## References

- 1 W. He, H. Liu, J. Cheng, Y. Li, C. Liu, C. Chen, J. Zhao, H. L. Xin, *ACS Appl. Mater. Interfaces*, 2022, **14**, 6869-6875.
- 2 W. He, J. Cheng, Y. Gao, C. Liu, J. Zhao, Y. Li, Q. Hao, *Nanoscale*, 2021, **13**, 12951-12955.
- 3 W. He, F. Wang, D. Jia, Y. Li, L. Liang, J. Zhang, Q. Hao, C. Liu, H. Liu, J. Zhao, *Nanoscale*, 2020, **12**, 24244-24250.
- 4 D. C. Nguyen, D. T. Tran, T. Doan, D. H. Kim, N. H. Kim, J. H. Lee, *Adv. Energy*

- Mater.*, 2020, **10**, 1903289.
- 5 L. Liu, X. Liu, S. Jiao, *J. Colloid Interface Sci.*, 2020, **564**, 77-87.
- 6 L. Hui, J. Cheng, W. He, Y. Li, J. Mao, X. Zheng, C. Chen, C. Cui, Q. Hao, *Appl. Catal. B*, 2022, **304**, 120935.
- 7 D. Jia, L. Han, Y. Li, W. He, C. Liu, J. Zhang, C. Chen, H. Liu, H. L. Xin, *J. Mater. Chem. A*, 2020, **8**, 18207-18214.
- 8 Y. Yang, H. Yao, Z. Yu, S. M. Islam, H. He, M. Yuan, Y. Yue, K. Xu, W. Hao, G. Sun, H. Li, S. Ma, P. Zapol, M. G. *J. Am. Chem. Soc.*, 2019, **141**, 10417-10430.
- 9 Z. Jing, Q. Zhao, D. Zheng, L. Sun, J. Geng, Q. Zhou, J. Lin, *J. Mater. Chem. A*, 2020, **8**, 20323-20330.
- 10 W. He, G. Ren, Y. Li, D. Jia, S. Li, J. Cheng, C. Liu, Q. Hao, J. Zhang, H. Liu, *Catal. Sci. Technology*, 2020, **10**, 1708-1713.
- 11 H. Zhang, X. Wang, Z. Yang, S. Yan, C. Zhang, S. Liu, *ACS Sustainable Chem. Eng.*, 2020, **8**, 1004-1014.
- 12 Y. Yang, Y. Kang, H. Zhao, X. Dai, Song, *Small*, 2020, **16**, 1905083.
- 13 X. Wu, T. Zhang, J. Wei, P. Feng, X. Yan, Y. Tang, *Nano Res.*, 2020, **13**, 2130-2135.
